# Supplementary material for: Competition between influenza A virus subtypes through heterosubtypic immunity modulates re-infection and antibody dynamics in the mallard duck
Source: PubMed Central journal article supplement (PMC5481145; doi:10.1371/journal.ppat.1006419), 2017-06-22
Supplement: ppat.1006419.s005.pdf [file ppat.1006419.s005.pdf]

**Supporting Information:**

**Influenza A virus immunity and subtype competition in mallards**

Neus Latorre-Margalef, Justin D. Brown, Alinde Fojtik, Rebecca L. Poulson, Deborah Carter, Monique Franca, David E. Stallknecht  
 DOI: 10.1371/journal.ppat.1006419

**S1 Table.**

| Group                           | Challenges<br>N birds | I (4 weeks of age) | II (9 weeks of age) |        | III (15 weeks of age) | III (19 weeks of age) |
|---------------------------------|-----------------------|--------------------|---------------------|--------|-----------------------|-----------------------|
|                                 |                       | 0 dpi              | 35 dpi (5 weeks)    | 57 dpi | 80 dpi (11 weeks)     | 108 dpi (15 weeks)    |
| H3N8 x H3N8 (5 week interval)   | 5                     | H3N8 * ✓           | H3N8 * ✓            | -      | -                     | -                     |
| controls H3N8 (9 weeks of age)  | 5                     | NA §               | H3N8 * ✓            | -      | -                     | -                     |
| H3N8 x H3N8 (11 week interval)  | 5                     | H3N8 * ✓           | NA §                | NA §   | H3N8 * ✓              | -                     |
| controls H3N8 (15 weeks of age) | 5                     | NA §               | NA §                | NA §   | H3N8 * ✓              | -                     |
| H3N8 x H3N8 (15 week interval)  | 5                     | H3N8 * ✓           | NA §                | NA §   | NA §                  | H3N8 * ✓              |
| controls H3N8 (19 weeks of age) | 5                     | NA §               | NA §                | NA §   | NA §                  | H3N8 * ✓              |
| H3N8 x H4N5                     | 5                     | H3N8 * ✓           | H4N5 * ✓            | -      | -                     | -                     |
| controls H4N5                   | 5                     | NA §               | H4N5 * ✓            | -      | -                     | -                     |
| H3N8 x H10N7                    | 5                     | H3N8 * ✓           | H10N7 * ✓           | -      | -                     | -                     |
| controls H10N7                  | 5                     | NA §               | H10N7 * ✓           | -      | -                     | -                     |
| H3N8 x H6N2                     | 5 (4 final)           | H3N8 * ✓           | H6N2 * ✓            | -      | -                     | -                     |
| controls H6N2                   | 5 (4 final)           | NA §               | H6N2 * ✓            | -      | -                     | -                     |
| H3N8 x H12N5                    | 5                     | H3N8 * ✓           | H12N5 * ✓           | -      | -                     | -                     |
| controls H12N5                  | 5                     | NA §               | H12N5 * ✓           | -      | -                     | -                     |

NA: Not applicable

✓ OP and CL swab sampling at 0-8 and 10, 12 and 14 dpi

\* blood samples at 0 and 14 dpi

§ additional blood sample taken
