# Supplementary material for: Competition between influenza A virus subtypes through heterosubtypic immunity modulates re-infection and antibody dynamics in the mallard duck
Source: PubMed Central journal article supplement (PMC5481145; doi:10.1371/journal.ppat.1006419), 2017-06-22
Supplement: ppat.1006419.s006.pdf [file ppat.1006419.s006.pdf]

**Supporting Information:**

**Influenza A virus immunity and subtype competition in mallards**

Neus Latorre-Margalef, Justin D. Brown, Alinde Fojtik, Rebecca L. Poulson, Deborah Carter, Monique Franca, David E. Stallknecht

DOI: 10.1371/journal.ppat.1006419

**S2 Table.**

**A)**

| <i>Models</i> | <i>DPI</i> | <i>Group</i> | <i>DPI * Group</i> | <i>np</i> | <i>AICc</i>   | $\Delta AICc$ | <i>AICc weights</i> |
|---------------|------------|--------------|--------------------|-----------|---------------|---------------|---------------------|
| <b>1</b>      | +          | +            | +                  | <b>6</b>  | <b>289.26</b> | <b>0</b>      | <b>0.843</b>        |
| 2             | +          | +            |                    | 5         | 292.62        | 3.36          | 0.157               |
| 3             | +          |              |                    | 4         | 313.05        | 23.79         | 0.000               |
| 4             |            | +            |                    | 4         | 322.53        | 33.27         | 0.000               |

**B)**

|                       | <b>Value</b> | <b>SE</b> | <b>DF</b> | <b>t-value</b> | <b>p-value</b>    |
|-----------------------|--------------|-----------|-----------|----------------|-------------------|
| Intercept Pre-exposed | 37.68        | 3.03      | 40        | 12.41          | <b>&lt; 0.001</b> |
| Group control         | -15.71       | 3.27      | 8         | -4.79          | <b>0.001</b>      |
| Day PI                | -0.02        | 0.52      | 40        | -0.041         | 0.967             |
| Group * Day PI        | 1.32         | 1.32      | 40        | 2.40           | <b>0.020</b>      |
