# Supplementary material for: Competition between influenza A virus subtypes through heterosubtypic immunity modulates re-infection and antibody dynamics in the mallard duck
Source: PubMed Central journal article supplement (PMC5481145; doi:10.1371/journal.ppat.1006419), 2017-06-22
Supplement: ppat.1006419.s008.pdf [file ppat.1006419.s008.pdf]

**Supporting Information:**

**Influenza A virus immunity and subtype competition in mallards**

Neus Latorre-Margalef, Justin D. Brown, Alinde Fojtik, Rebecca L. Poulson, Deborah Carter, Monique Franca, David E. Stallknecht

DOI: 10.1371/journal.ppat.1006419

**S4 Table.**

**A)**

| <i>Models</i> | <i>DPI</i> | <i>Group</i> | <i>DPI *Group</i> | <i>np</i> | <i>AICc</i>   | <i>ΔAICc</i> | <i>AICc weights</i> |
|---------------|------------|--------------|-------------------|-----------|---------------|--------------|---------------------|
| <b>1</b>      | +          | +            | +                 | <b>6</b>  | <b>213.93</b> | <b>0</b>     | <b>0.446</b>        |
| 2             | +          |              |                   | 4         | 213.98        | 0.05         | 0.435               |
| 3             | +          | +            |                   | 5         | 216.57        | 2.64         | 0.119               |
| 4             |            | +            |                   | 4         | 226.21        | 12.28        | 0.001               |

**B)**

|                       | <b>Value</b> | <b>SE</b> | <b>DF</b> | <b>t-value</b> | <b>p-value</b>   |
|-----------------------|--------------|-----------|-----------|----------------|------------------|
| Intercept Pre-exposed | 45.72        | 7.63      | 25        | 5.98           | <b>&lt;0.001</b> |
| Group control         | -17.97       | 7.79      | 6         | -2.30          | 0.060            |
| Day PI                | -0.2.17      | 1.34      | 25        | -1.61          | 0.119            |
| Group * Day PI        | 3.16         | 1.36      | 25        | 2.31           | <b>0.029</b>     |
