# Supplementary material for: Competition between influenza A virus subtypes through heterosubtypic immunity modulates re-infection and antibody dynamics in the mallard duck
Source: PubMed Central journal article supplement (PMC5481145; doi:10.1371/journal.ppat.1006419), 2017-06-22
Supplement: ppat.1006419.s009.pdf [file ppat.1006419.s009.pdf]

**Supporting Information:**

**Influenza A virus immunity and subtype competition in mallards**

Neus Latorre-Margalef, Justin D. Brown, Alinde Fojtik, Rebecca L. Poulson, Deborah Carter, Monique Franca, David E. Stallknecht

DOI: 10.1371/journal.ppat.1006419

**S5 Table.**

| <b>Group</b>                    | <b>Mean AUC</b> | <b>SE AUC</b> | <b>Mean Duration</b> | <b>SE Duration</b> |
|---------------------------------|-----------------|---------------|----------------------|--------------------|
| H3N8 pre-challenge              | 72.74           | 5.22          | 8.4                  | 0.87               |
| H3N8 x H3N8 (5 weeks interval)  | 6.62            | 0.71          | 0                    | 0                  |
| controls H3N8 (9 weeks of age)  | 101.19          | 6.99          | 8.4                  | 1.6                |
| H3N8 x H3N8 (11 weeks interval) | 6.38            | 2.69          | 0                    | 0                  |
| controls H3N8 (15 weeks of age) | 53.05           | 7.1           | 6                    | 0.89               |
| H3N8 x H3N8 (15 weeks interval) | 4.96            | 3.19          | 0                    | 0                  |
| controls H3N8 (19 weeks of age) | 45.25           | 4.64          | 4.8                  | 0.49               |
| H3N8 x H4N5                     | 8.63            | 3.46          | 2.4                  | 1.6                |
| controls H4N5                   | 64.21           | 9.3           | 8.8                  | 1.33               |
| H3N8 x H10N7                    | 30.78           | 7.62          | 3.6                  | 0.98               |
| controls H10N7                  | 66.57           | 2.49          | 7.6                  | 1.33               |
| H3N8 x H6N2 corrected           | 36.76           | 7.58          | 5                    | 0.58               |
| controls H6N2                   | 86.5            | 2.58          | 7                    | 1.29               |
