# Supplementary material for: Competition between influenza A virus subtypes through heterosubtypic immunity modulates re-infection and antibody dynamics in the mallard duck
Source: PubMed Central journal article supplement (PMC5481145; doi:10.1371/journal.ppat.1006419), 2017-06-22
Supplement: ppat.1006419.s010.pdf [file ppat.1006419.s010.pdf]

**Supporting Information:**

**Influenza A virus immunity and subtype competition in mallards**

Neus Latorre-Margalef, Justin D. Brown, Alinde Fojtik, Rebecca L. Poulson, Deborah Carter, Monique Franca, David E. Stallknecht

DOI: 10.1371/journal.ppat.1006419

**S6 Table.**

**A)**

| <i>Models</i> | <i>DPI</i> | <i>Group</i> | <i>DPI *Group</i> | <i>np</i> | <i>AICc</i>   | <i>ΔAICc</i> | <i>AICc weights</i> |
|---------------|------------|--------------|-------------------|-----------|---------------|--------------|---------------------|
| <b>1</b>      | +          | +            |                   | <b>5</b>  | <b>968.27</b> | <b>0</b>     | <b>0.798</b>        |
| 2             | +          | +            | +                 | 6         | 971.02        | 2.75         | 0.202               |
| 3             | +          |              |                   | 4         | 983.54        | 15.27        | 0.000               |
| 4             |            | +            |                   | 4         | 1094.5        | 126.21       | 0.000               |

**B)**

|                            | <b>Value</b> | <b>SE</b> | <b>DF</b> | <b>t-value</b> | <b>p-value</b>   |
|----------------------------|--------------|-----------|-----------|----------------|------------------|
| Intercept (4 weeks of age) | 24.21        | 0.67      | 150       | 35.84          | <b>&lt;0.001</b> |
| Group control (9 weeks)    | -1.57        | 0.73      | 21        | -2.15          | <b>0.043</b>     |
| Group control (15 weeks)   | 1.33         | 0.76      | 21        | 1.74           | 0.095            |
| Group control (19 weeks)   | 2.37         | 0.79      | 21        | 2.99628        | <b>0.006</b>     |
| Day PI                     | 1.19         | 0.08      | 150       | 13.55          | <b>&lt;0.001</b> |
