# Supplementary material for: Competition between influenza A virus subtypes through heterosubtypic immunity modulates re-infection and antibody dynamics in the mallard duck
Source: PubMed Central journal article supplement (PMC5481145; doi:10.1371/journal.ppat.1006419), 2017-06-22
Supplement: ppat.1006419.s011.pdf [file ppat.1006419.s011.pdf]

**Supporting Information:**

**Influenza A virus immunity and subtype competition in mallards**

Neus Latorre-Margalef, Justin D. Brown, Alinde Fojtik, Rebecca L. Poulson, Deborah Carter, Monique Franca, David E. Stallknecht

DOI: 10.1371/journal.ppat.1006419

**S7 Table.**

**A)**

| <i>Models</i> | <i>DPI</i> | <i>Group</i> | <i>DPI *Group</i> | <i>np</i> | <i>AICc</i>   | <i>ΔAICc</i> | <i>AICc weights</i> |
|---------------|------------|--------------|-------------------|-----------|---------------|--------------|---------------------|
| <b>1</b>      | +          | +            | +                 | <b>6</b>  | <b>258.17</b> | <b>0</b>     | <b>0.603</b>        |
| 2             | +          | +            |                   | 5         | 259.84        | 1.67         | 0.262               |
| 3             | +          |              |                   | 4         | 262.04        | 3.87         | 0.087               |
| 4             |            | +            |                   | 4         | 263.2         | 5.03         | 0.049               |

**B)**

|                       | <b>Value</b> | <b>SE</b> | <b>DF</b> | <b>t-value</b> | <b>p-value</b> |
|-----------------------|--------------|-----------|-----------|----------------|----------------|
| Intercept Pre-exposed | 38.93        | 3.24      | 34        | 11.98          | < <b>0.001</b> |
| Group control         | -10.42       | 3.56      | 7         | -2.92          | <b>0.022</b>   |
| Day PI                | -0.73        | 0.64      | 34        | -1.12          | < <b>0.001</b> |
| Group * Day PI        | 1.39         | 0.68      | 34        | 2.03           | <b>0.049</b>   |
