# Supplementary material for: Competition between influenza A virus subtypes through heterosubtypic immunity modulates re-infection and antibody dynamics in the mallard duck
Source: PubMed Central journal article supplement (PMC5481145; doi:10.1371/journal.ppat.1006419), 2017-06-22
Supplement: ppat.1006419.s012.pdf [file ppat.1006419.s012.pdf]

**Supporting Information:**

**Influenza A virus immunity and subtype competition in mallards**

Neus Latorre-Margalef, Justin D. Brown, Alinde Fojtik, Rebecca L. Poulson, Deborah Carter, Monique Franca, David E. Stallknecht

DOI: 10.1371/journal.ppat.1006419

**S8 Table.**

**A)**

| <i>Models</i> | <i>DPI</i> | <i>Group</i> | <i>DPI *Group</i> | <i>np</i> | <i>AICc</i>   | <i>ΔAICc</i> | <i>AICc weights</i> |
|---------------|------------|--------------|-------------------|-----------|---------------|--------------|---------------------|
| <b>1</b>      | +          | +            |                   | <b>5</b>  | <b>332.44</b> | <b>0</b>     | <b>0.745</b>        |
| 2             | +          | +            | +                 | 6         | 334.59        | 2.15         | 0.254               |
| 3             | +          |              |                   | 4         | 346.44        | 14           | 0.001               |
| 4             |            | +            |                   | 4         | 356.71        | 24.27        | 0.000               |

**B)**

|                       | <b>Value</b> | <b>SE</b> | <b>DF</b> | <b>t-value</b> | <b>p-value</b>    |
|-----------------------|--------------|-----------|-----------|----------------|-------------------|
| Intercept Pre-exposed | 29.27        | 1.21      | 47        | 24.06          | <b>&lt; 0.001</b> |
| Group control         | -4.85        | 1.06      | 8         | -4.57          | <b>0.001</b>      |
| Day PI                | 1.11         | 0.19      | 47        | 5.66           | <b>&lt; 0.001</b> |
