# Supplementary material for: Competition between influenza A virus subtypes through heterosubtypic immunity modulates re-infection and antibody dynamics in the mallard duck
Source: PubMed Central journal article supplement (PMC5481145; doi:10.1371/journal.ppat.1006419), 2017-06-22
Supplement: ppat.1006419.s013.pdf [file ppat.1006419.s013.pdf]

**Supporting Information:**

**Influenza A virus immunity and subtype competition in mallards**

Neus Latorre-Margalef, Justin D. Brown, Alinde Fojtik, Rebecca L. Poulson, Deborah Carter, Monique Franca, David E. Stallknecht

DOI: 10.1371/journal.ppat.1006419

**S9 Table.**

**A)**

| <i>Models</i> | <i>DPI</i> | <i>Group</i> | <i>DPI *Group</i> | <i>np</i> | <i>AICc</i>   | <i>ΔAICc</i> | <i>AICc weights</i> |
|---------------|------------|--------------|-------------------|-----------|---------------|--------------|---------------------|
| <b>1</b>      | +          | +            |                   | <b>5</b>  | <b>492.61</b> | <b>0</b>     | <b>0.595</b>        |
| 2             | +          | +            | +                 | 6         | 493.86        | 1.25         | 0.318               |
| 3             | +          |              |                   | 4         | 496.46        | 3.85         | 0.087               |
| 4             |            | +            |                   | 4         | 560.91        | 68.3         | 0.000               |

**B)**

|                       | <b>Value</b> | <b>SE</b> | <b>DF</b> | <b>t-value</b> | <b>p-value</b> |
|-----------------------|--------------|-----------|-----------|----------------|----------------|
| Intercept Pre-exposed | 24.85        | 0.94      | 76        | 26.20          | < <b>0.001</b> |
| Group control         | -2.52        | 0.91      | 8         | -2.75          | <b>0.024</b>   |
| Day PI                | 1.37         | 0.13      | 76        | 10.36          | < <b>0.001</b> |
