# Supplementary material for: Competition between influenza A virus subtypes through heterosubtypic immunity modulates re-infection and antibody dynamics in the mallard duck
Source: PubMed Central journal article supplement (PMC5481145; doi:10.1371/journal.ppat.1006419), 2017-06-22
Supplement: ppat.1006419.s014.pdf [file ppat.1006419.s014.pdf]

**Supporting Information:**

**Influenza A virus immunity and subtype competition in mallards**

Neus Latorre-Margalef, Justin D. Brown, Alinde Fojtik, Rebecca L. Poulson, Deborah Carter, Monique Franca, David E. Stallknecht

DOI: 10.1371/journal.ppat.1006419

**S10 Table.**

**A)**

| <i>Models</i> | <i>Ct-val.</i> | <i>ST</i> | <i>Treat.</i> | <i>DPI</i> | <i>np</i> | <i>AICc</i>   | <i>ΔAICc</i> | <i>AICc weights</i> |
|---------------|----------------|-----------|---------------|------------|-----------|---------------|--------------|---------------------|
| 1             | +              |           | +             | +          | 5         | <b>216.87</b> | <b>0.000</b> | <b>0.626</b>        |
| 2             | +              | +         | +             | +          | 6         | 217.93        | 1.060        | 0.369               |
| 3             | +              |           |               | +          | 4         | 226.42        | 9.550        | 0.005               |
| 4             | +              |           | +             |            | 4         | 237.4         | 20.530       | 0.000               |
| 5             | +              | +         |               |            | 5         | 239.44        | 22.570       | 0.000               |
| 6             | +              |           |               |            | 3         | 238.64        | 21.770       | 0.000               |
| 7             | +              | +         | +             |            | 4         | 240.71        | 23.840       | 0.000               |
| 8             |                | +         |               | +          | 4         | 285.6         | 68.730       | 0.000               |
| 9             |                |           |               | +          | 3         | 287.92        | 71.050       | 0.000               |
| 10            |                |           | +             |            | 3         | 389.94        | 173.070      | 0.000               |
| 11            |                | +         | +             |            | 4         | 391.23        | 174.360      | 0.000               |
| 12            |                |           |               |            | 2         | 399.73        | 182.860      | 0.000               |
| 13            |                | +         |               |            | 3         | 401.28        | 184.410      | 0.000               |

**B)**

|                                     | <b>Value</b> | <b>SE</b> | <b>z-value</b> | <b>p-value</b>    |
|-------------------------------------|--------------|-----------|----------------|-------------------|
| Intercept<br>(primary<br>infection) | 17.28        | 0.29      | 59.2           | <b>&lt; 0.001</b> |
| DPI                                 | -0.32        | 0.005     | -63.5          | <b>&lt; 0.001</b> |
| Ct-value                            | -0.41        | 0.005     | -76.4          | <b>&lt; 0.001</b> |
| Secondary<br>infection              | -1.85        | 0.005     | -365.5         | <b>&lt; 0.001</b> |
