# Supplementary material for: Competition between influenza A virus subtypes through heterosubtypic immunity modulates re-infection and antibody dynamics in the mallard duck
Source: PubMed Central journal article supplement (PMC5481145; doi:10.1371/journal.ppat.1006419), 2017-06-22
Supplement: ppat.1006419.s015.pdf [file ppat.1006419.s015.pdf]

**Supporting Information:**

**Influenza A virus immunity and subtype competition in mallards**

Neus Latorre-Margalef, Justin D. Brown, Alinde Fojtik, Rebecca L. Poulson, Deborah Carter, Monique Franca, David E. Stallknecht

DOI: 10.1371/journal.ppat.1006419

**S11 Table.**

|                  | <b>H3xH3 (5w)</b> | <b>H3xH4</b> | <b>H3xH10</b> | <b>H3xH6</b> | <b>H3xH3 (11w)</b> | <b>H3xH3 (15w)</b> |
|------------------|-------------------|--------------|---------------|--------------|--------------------|--------------------|
| <b>Day 0 pi</b>  | 5.82 ± 0.85       | 6.32 ± 0-63  | 4.57 ± 0.22   | 6.30 ± 0.5   | 6.12 ± 0.66        | 6.32 ± 0.31        |
| <b>Day 14 pi</b> | 5.92 ± 0.5        | 7.32 ± 0.63  | 5.66 ± 0.51   | 5.90 ± 0.28  | 8.50 ± 0.58        | 7.70 ± 0.36        |
