# Supplementary material for: Competition between influenza A virus subtypes through heterosubtypic immunity modulates re-infection and antibody dynamics in the mallard duck
Source: PubMed Central journal article supplement (PMC5481145; doi:10.1371/journal.ppat.1006419), 2017-06-22
Supplement: ppat.1006419.s016.pdf [file ppat.1006419.s016.pdf]

**Supporting Information:**

**Influenza A virus immunity and subtype competition in mallards**

Neus Latorre-Margalef, Justin D. Brown, Alinde Fojtik, Rebecca L. Poulson, Deborah Carter, Monique Franca, David E. Stallknecht

DOI: 10.1371/journal.ppat.1006419

**S12 Table.**

**A)**

| <i>Models</i> | <i>DPI</i> | <i>Group</i> | <i>DPI *Group</i> | <i>np</i> | <i>AICc</i>   | <i>ΔAICc</i> | <i>AICc weights</i> |
|---------------|------------|--------------|-------------------|-----------|---------------|--------------|---------------------|
| <b>1</b>      | +          |              |                   | <b>4</b>  | <b>166.83</b> | <b>0</b>     | <b>0.379</b>        |
| 2             | +          | +            |                   | 7         | 167.01        | 0.18         | 0.347               |
| 3             | +          | +            | +                 | 10        | 168.59        | 1.76         | 0.157               |
| 4             |            | +            |                   | 6         | 169.19        | 2.36         | 0.117               |

**B)**

|                       | <b>Value</b> | <b>SE</b> | <b>DF</b> | <b>t-value</b> | <b>p-value</b>    |
|-----------------------|--------------|-----------|-----------|----------------|-------------------|
| Intercept Pre-exposed | 5.09         | 0.37      | 30        | 14.09          | <b>&lt; 0.001</b> |
| Day pi 35             | 0.02         | 0.009     | 30        | 2.31           | <b>0.02</b>       |
